# Supplementary material
Source: publisher figshare collection journal article supplement (https://acs.figshare.com/ndownloader/files/3621018)
Supplement: Supplementary file 1 [file 3621018]

## Supporting Information

to the paper by Bo-Hong Liu et al.

### Stabilization of two-dimensional zinc oxide on metals:

#### Reconstruction vs hydroxylation

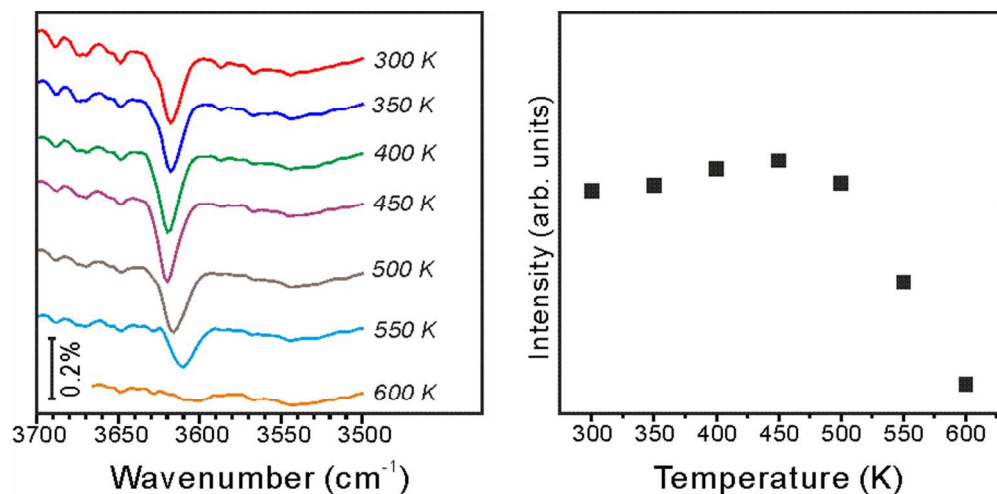

**Figure S1.** (Left panel) IRA- spectra showing the  $\nu(\text{OH})$  region on the pure bilayer ZnO film (top spectrum) and after repeated thermal flashes to the indicated temperatures. The spectra are offset for clarity. (Right panel) Intensity of the IRA-peak as a function of annealing temperature.
